# Supplementary material for: Evolutionary and Structural Features of the C2, V3 and C3 Envelope Regions Underlying the Differences in HIV-1 and HIV-2 Biology and Infection
Source: PubMed Central journal article supplement (PMC3024314; doi:10.1371/journal.pone.0014548), 2011-01-20
Supplement: pone.0014548.s001.pdf [file pone.0014548.s001.pdf]

A

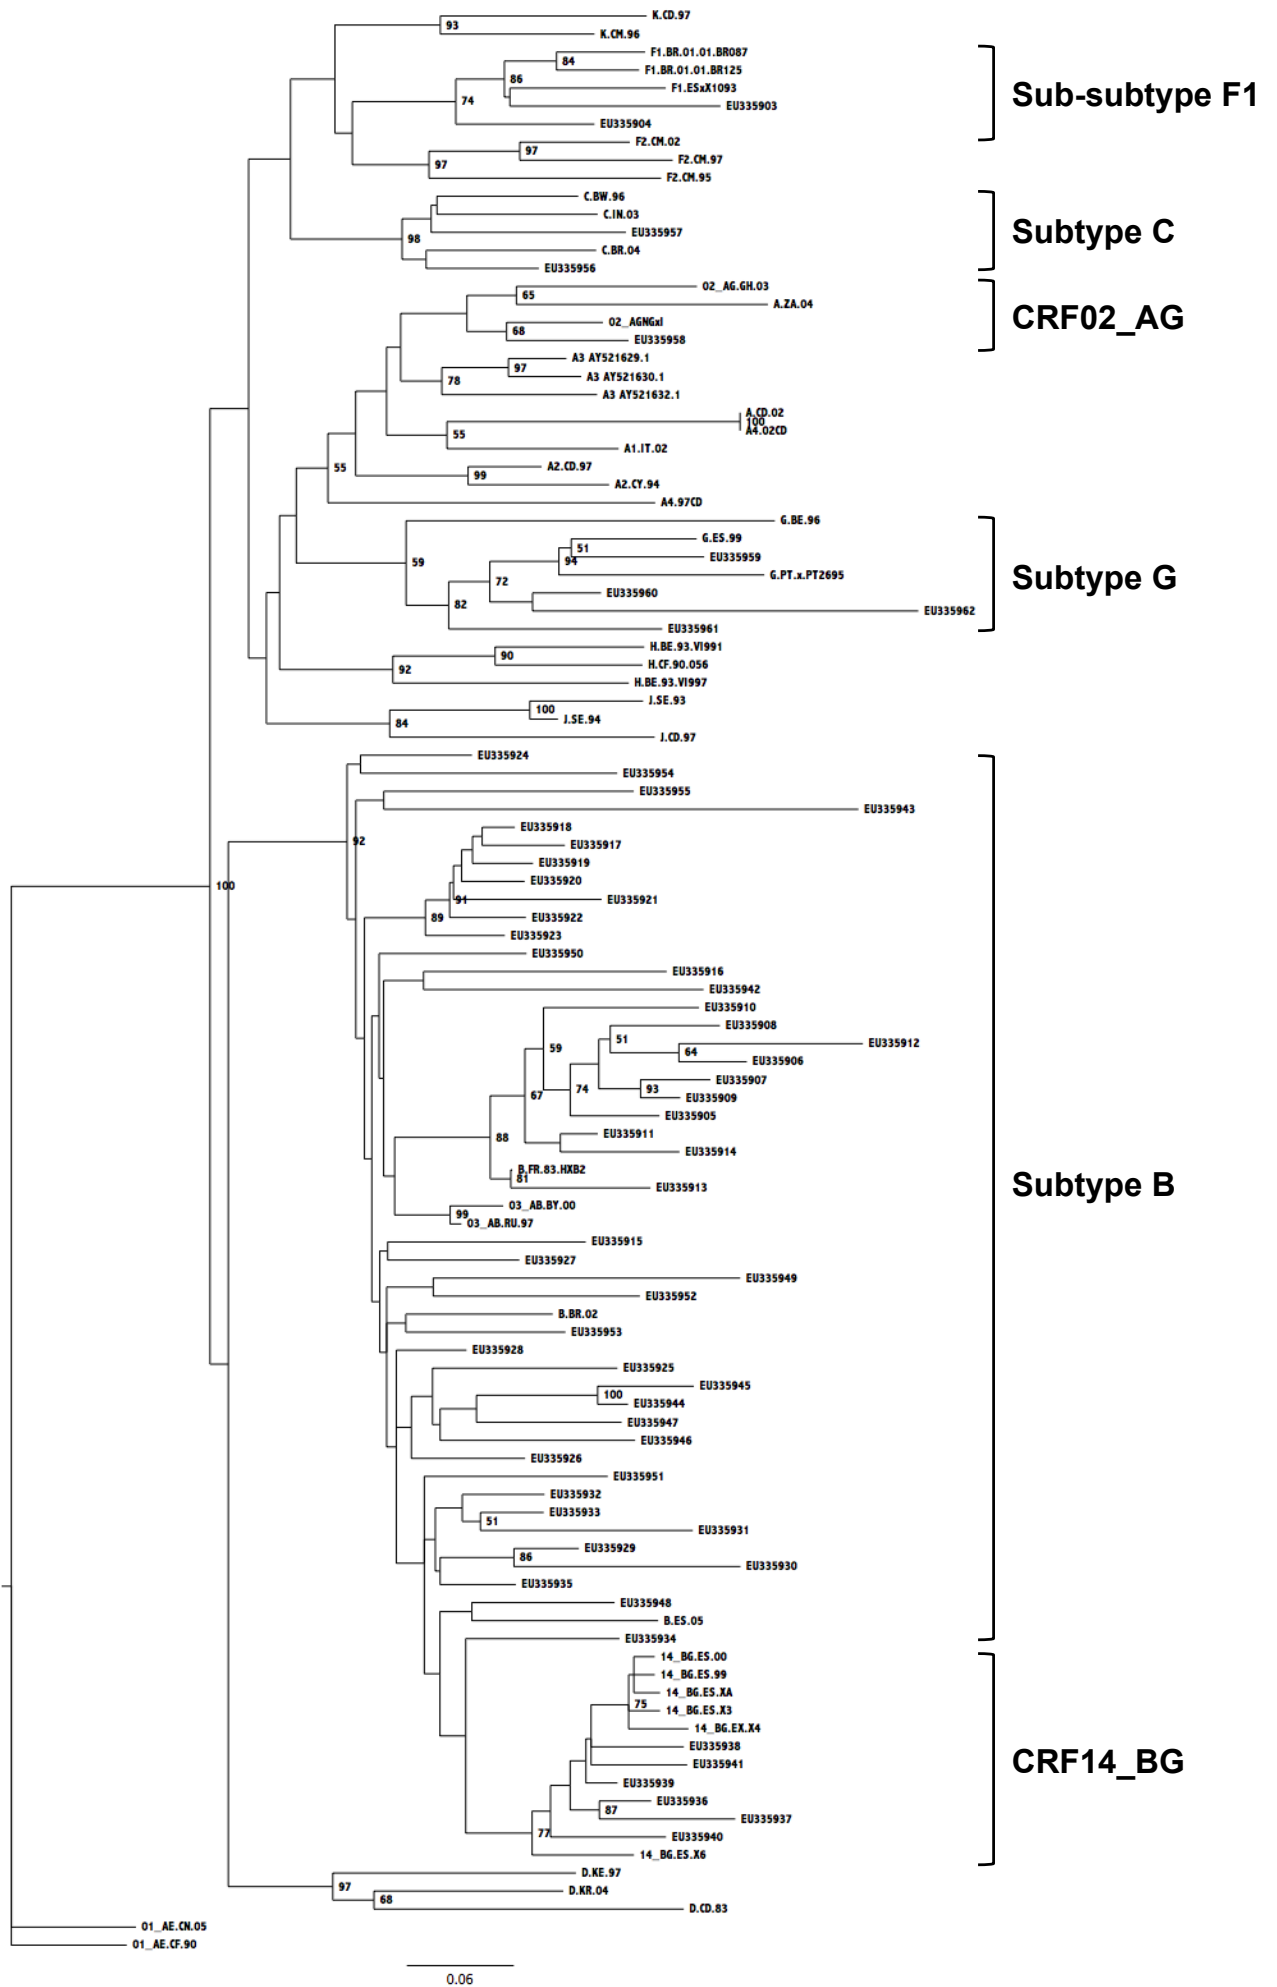

B

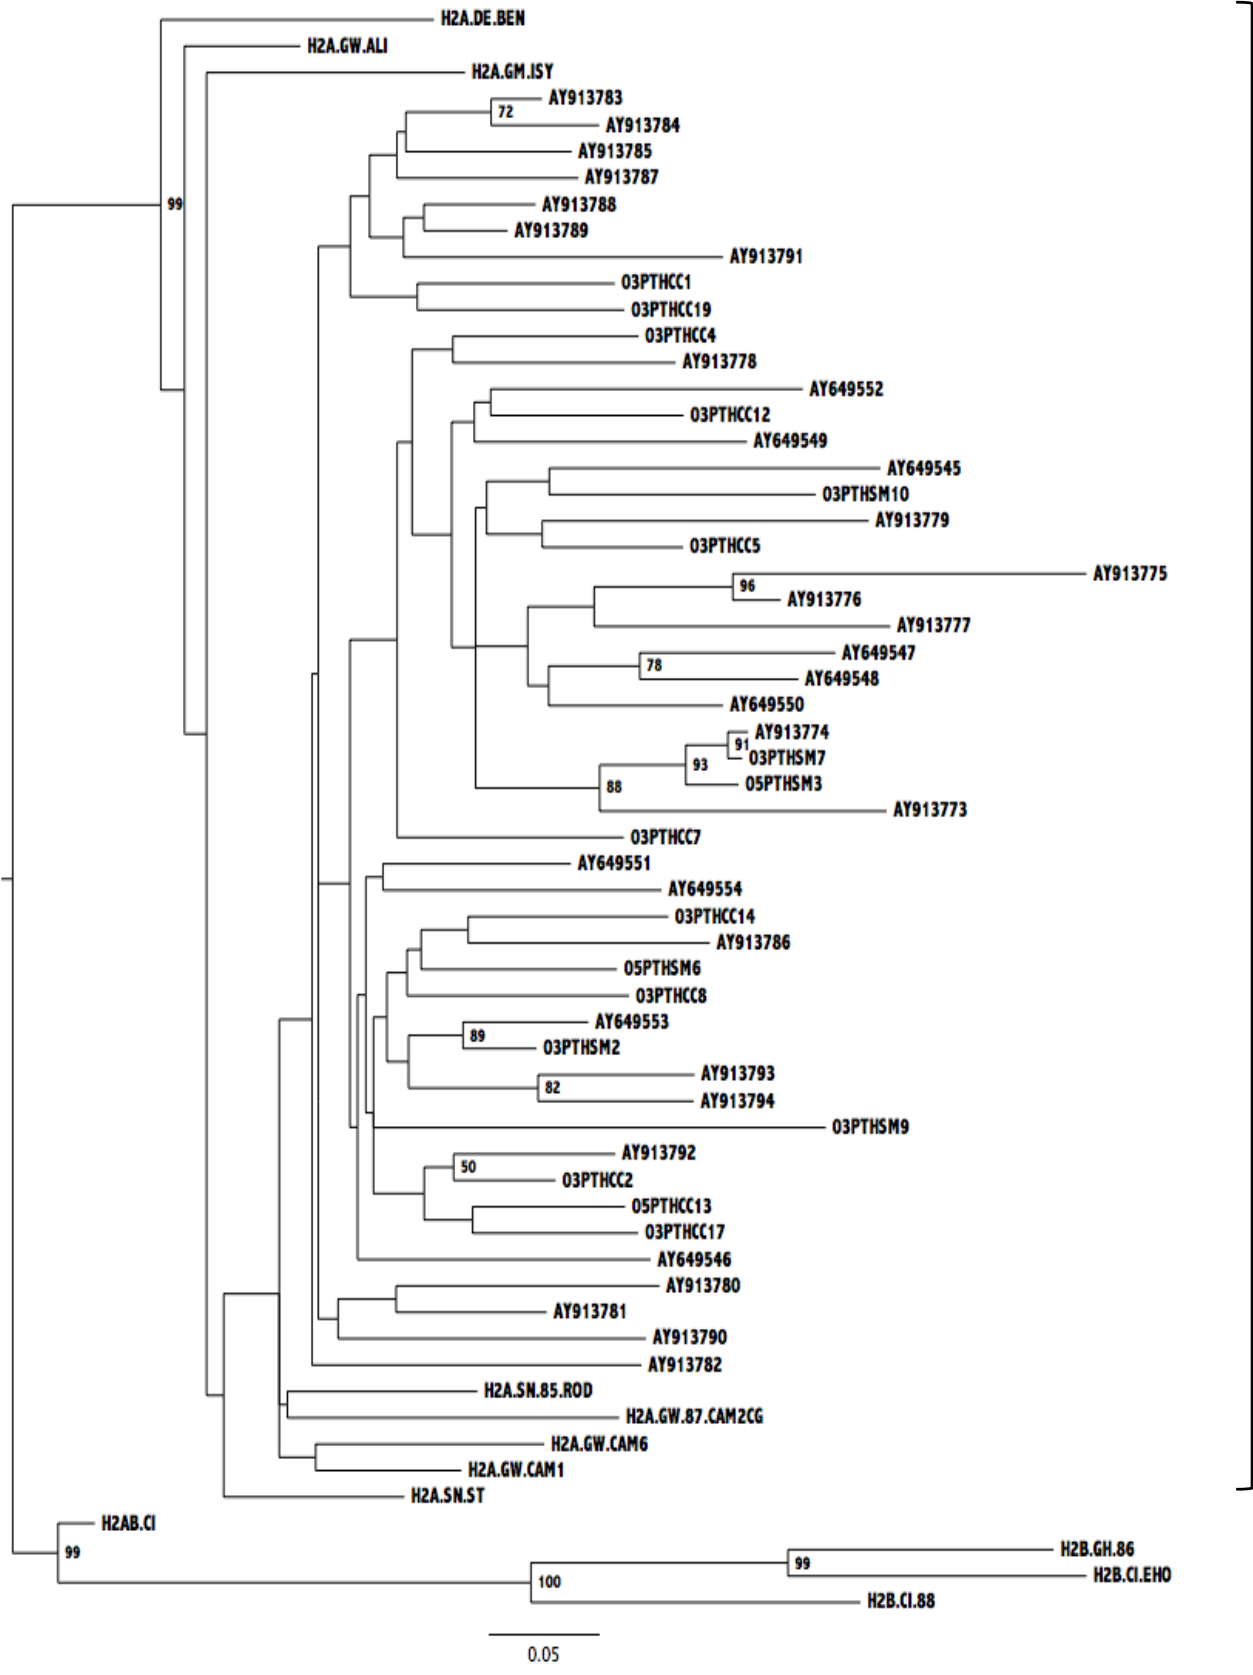

Group A
